# Supplementary material for: Lipid micelles packaged with semiconducting polymer dots as simultaneous MRI/photoacoustic imaging and photodynamic/photothermal dual-modal therapeutic agents for liver cancer
Source: Royal Society of Chemistry journal article supplement (doi:10.1039/c5tb01827g), 2015-12-09
Supplement: c5tb01827g1.pdf [file c5tb01827g1.pdf]

## Electronic Supplementary Information (ESI)

### Lipid-micelles packaged with semiconducting polymer dots as simultaneous MRI / photoacoustic imaging and photodynamic / photothermal dual-modal therapeutic agents for liver cancer

Da Zhang, †‡ Ming Wu, †‡ Yongyi Zeng, †‡§ Naishun Liao, †‡ Zhixiong Cai, †‡ Gang Liu,

† Xiaolong Liu†‡\*, Jingfeng Liu†‡§\*

\*Corresponding Author (correspondence should be address to Xiaolong Liu and Jingfeng Liu),

E-mail addresses: xiaoloong.liu@gmail.com, drjingfeng@126.com

Figure S1

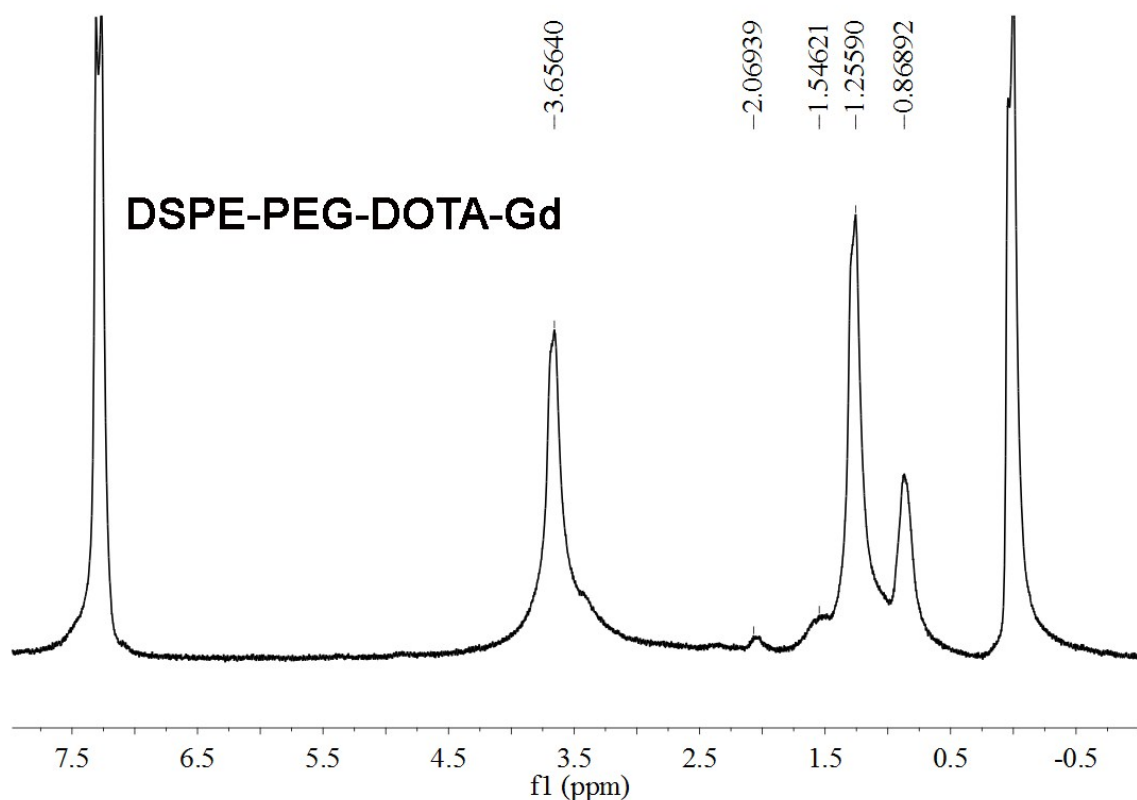

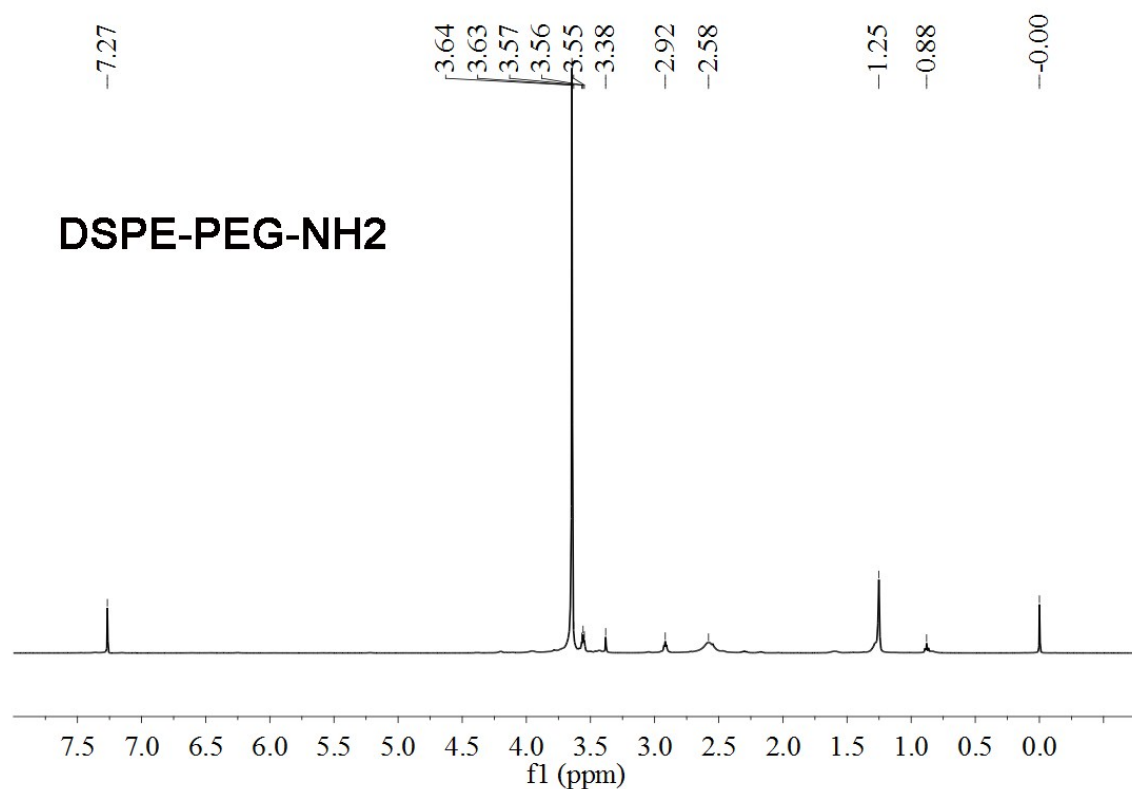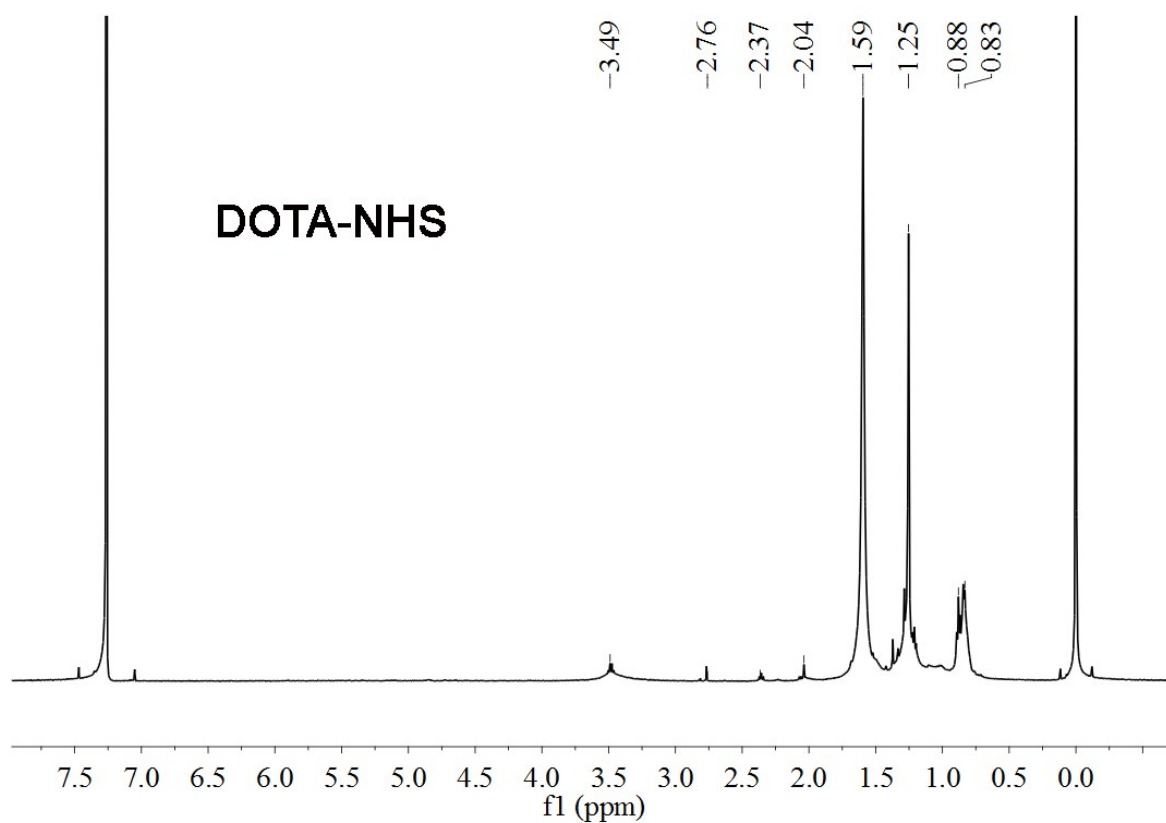

Figure S1. <sup>1</sup>H NMR spectra of lipid-Gd-DOTA (DSPE-PEG-DOTA-Gd), lipid-PEG (DSPE-PEG-NH<sub>2</sub>) and DOTA-NHS.

Figure S2

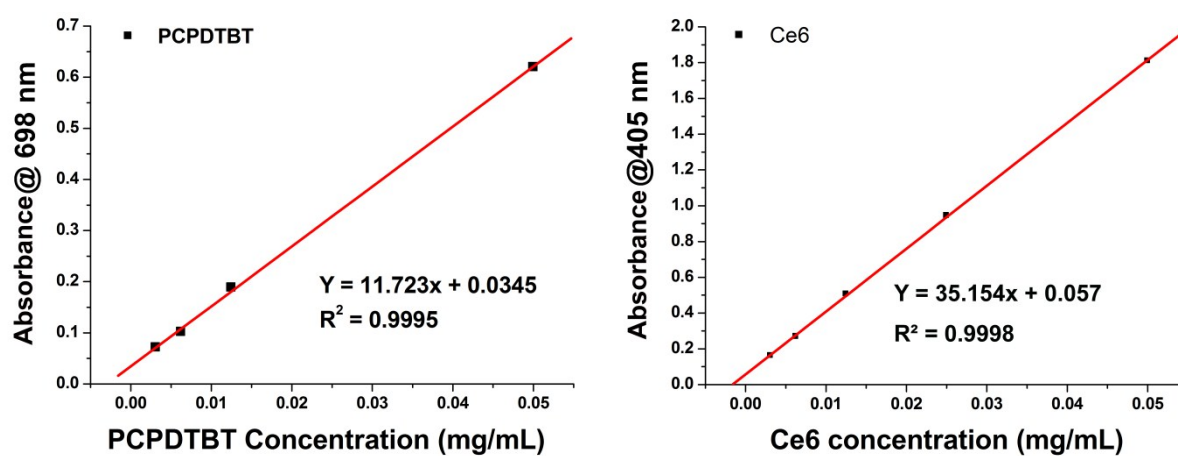

Figure S2. the linear fit of the absorbance of various concentration of PCPDTBT from 0.003125 to 0.05mg/mL in THF (left); The linear fit of the absorbance of various concentration of Ce6 from 0.003125 to 0.05mg/mL in DMSO (right).

Figure S3

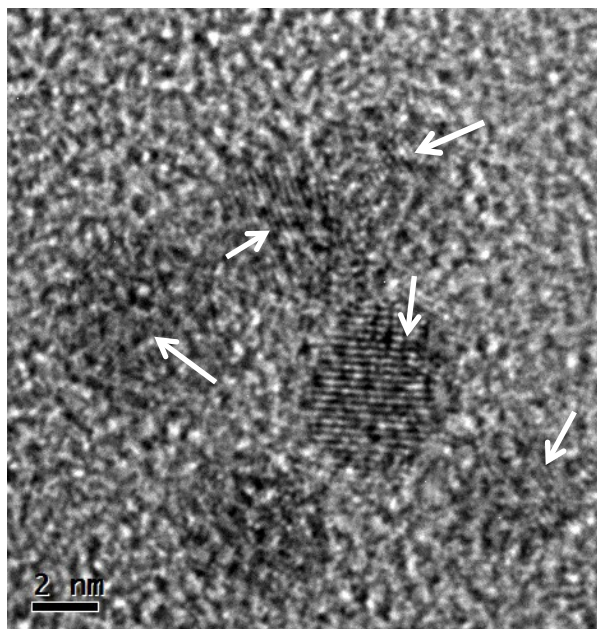

Figure S3. Enlarged TEM image of the prepared Pdots from Pdots/Ce6@lipid-Gd-DOTA micelles (scale bar = 2 nm).

Figure S4

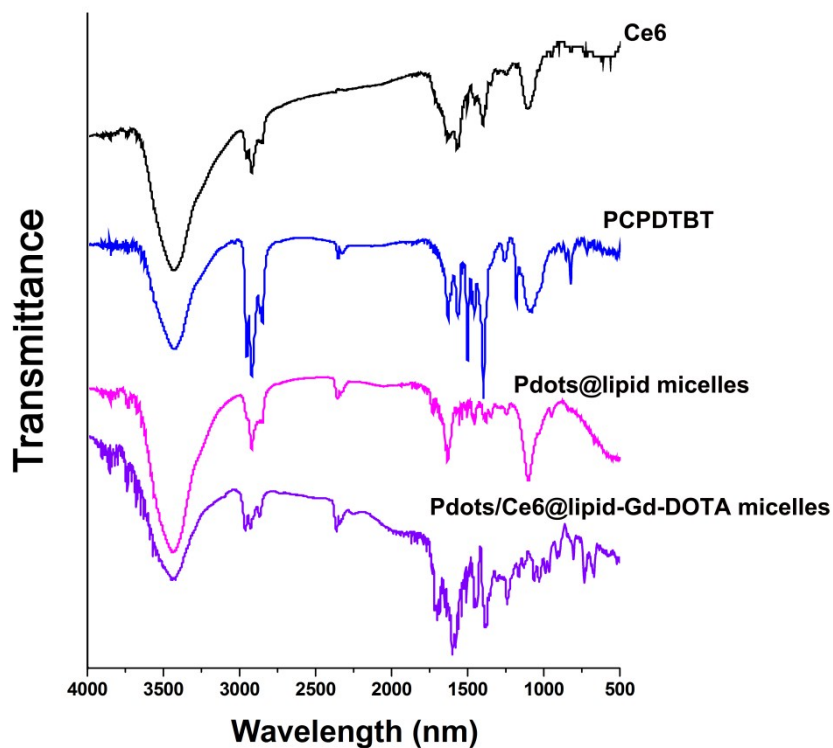

Figure S4. The FT-IR spectra of the free Ce6, PCPDTBT, Pdots@lipid micelles and Pdots/Ce6@lipid-Gd-DOTA micelles.

Figure S5

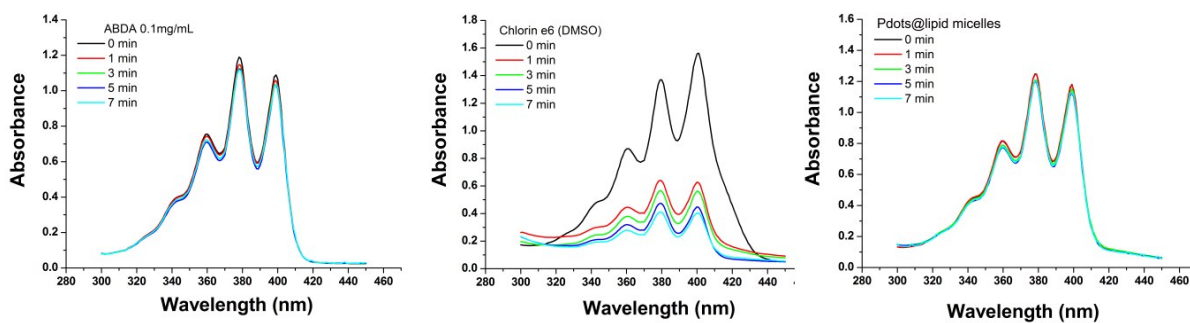

Figure S5. The absorbance of 9, 10-dimethylanthracene (ABDA, 20 mM) after photodecomposition by ROS generation upon NIR laser irradiation. (a) ABDA in water (670 nm, 0.5 W/cm<sup>2</sup>); (b) free Ce6 in DMSO (670 nm, 0.5 W/cm<sup>2</sup>); (c) Pdots@lipid micelles in water (670 nm, 0.5 W/cm<sup>2</sup>).

Figure S6

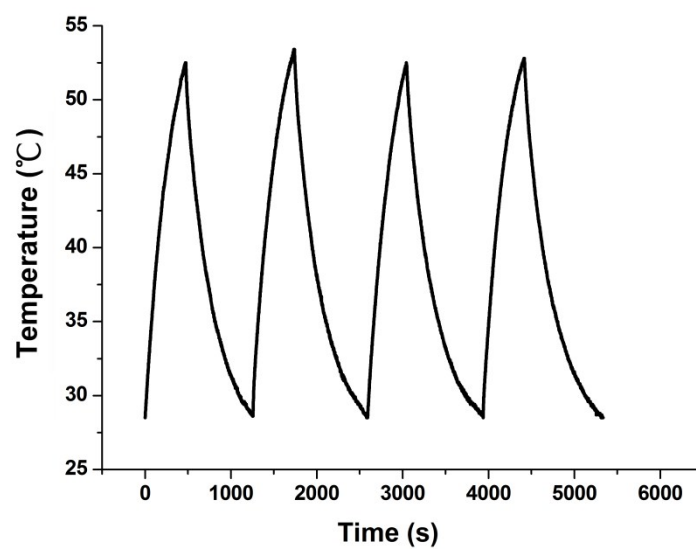

Figure S6. Temperature elevation curves of Pdots/Ce6@lipid-Gd-DOTA micelles over four rounds of 670 nm laser on/off cycling at power intensity of 0.5 W/cm<sup>2</sup>.

Figure S7

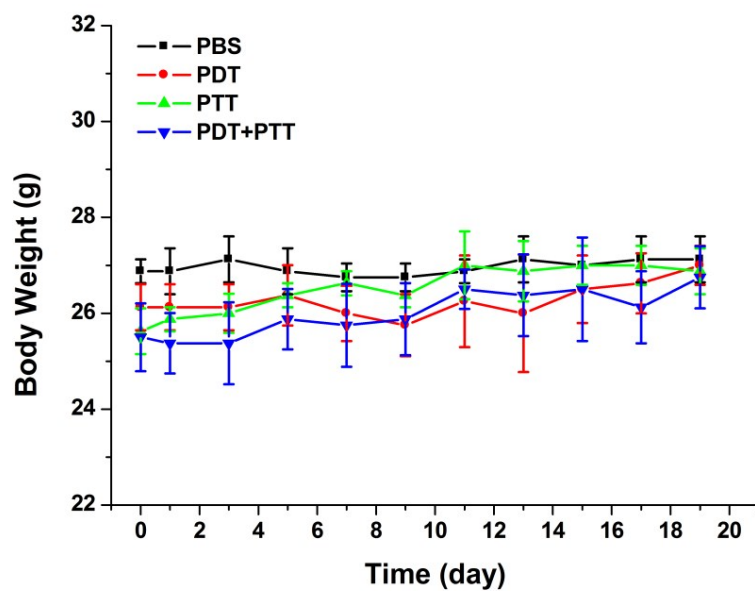

Figure S7. Mean body weights of mice in different groups after treatment (n = 4).



Figure S8

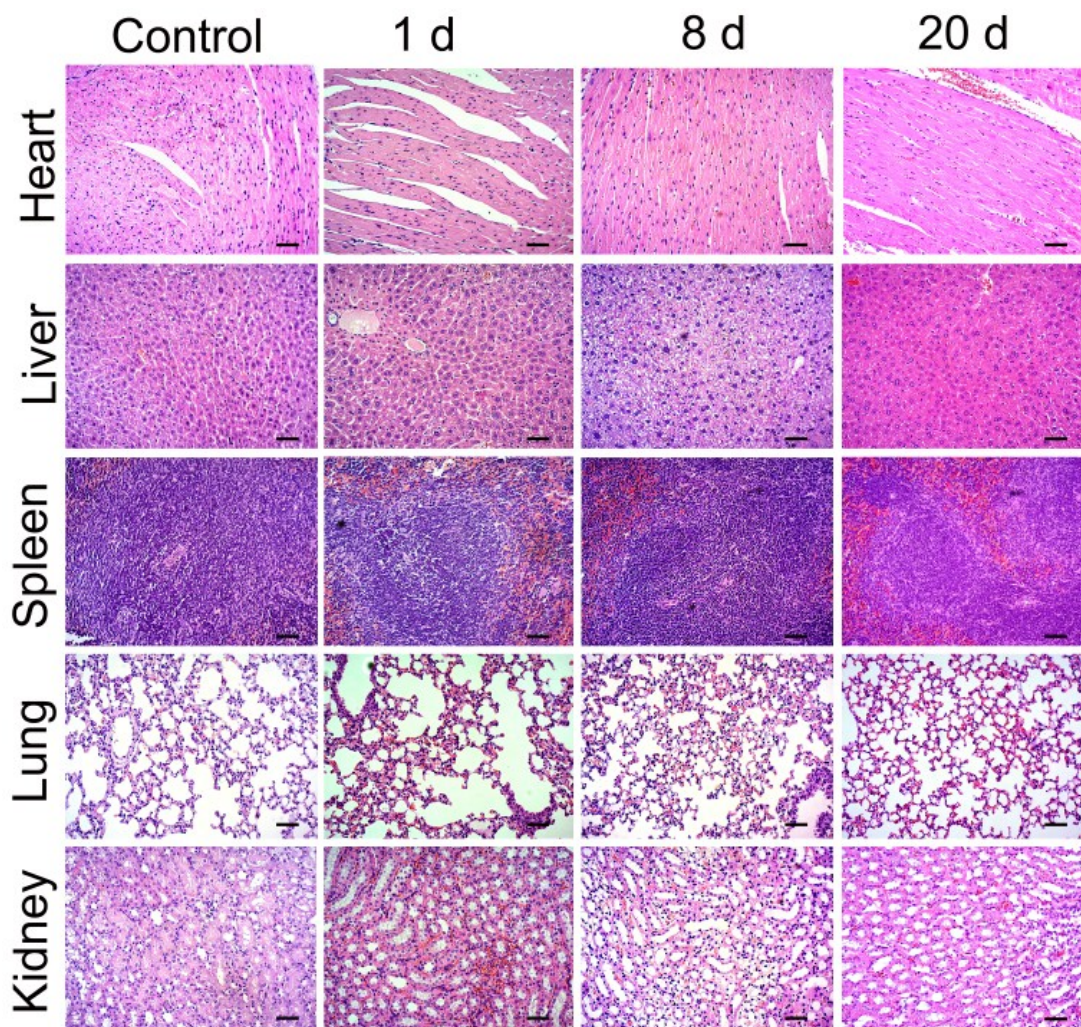

Figure S8. The pathological changes of main organs evaluated by H&E staining which were acquired at different time intervals post intravenous injection of Pdots/Ce6@lipid-Gd-DOTA micelles. (Scale bar: 50 μm). No noticeable pathological changes were observed in these organs.
